# Supplementary material for: Solid acid-reduced graphene oxide nanohybrid for enhancing thermal stability, mechanical property and flame retardancy of polypropylene
Source: Royal Society of Chemistry journal article supplement (doi:10.1039/c5ra04699h), 2015-01-01
Supplement: c5ra04699h1.pdf [file c5ra04699h1.pdf]

Electronic Supplementary Information

**Solid acid-reduced graphene oxide nanohybrid for enhancing thermal stability,  
mechanical property and flame retardancy of polypropylene**

Bihe Yuan,<sup>a,b</sup> Lei Song,<sup>\*,a</sup> Kim Meow Liew,<sup>c</sup> Yuan Hu<sup>\*,a,b</sup>

*<sup>a</sup> State Key Laboratory of Fire Science, University of Science and Technology of  
China, Hefei 230026, China*

*<sup>b</sup> USTC-CityU Joint Advanced Research Centre, Suzhou Key Laboratory of Urban  
Public Safety, Suzhou Institute for Advanced Study, University of Science and  
Technology of China, Suzhou 215123, China*

*<sup>c</sup> Department of Architecture and Civil Engineering, City University of Hong Kong,  
Tat Chee Avenue, Kowloon, Hong Kong*

\* Correspondence to: Yuan Hu; Lei Song.

Tel/fax: +86-551-63601664

E-mail: [yuanhu@ustc.edu.cn](mailto:yuanhu@ustc.edu.cn); [leisong@ustc.edu.cn](mailto:leisong@ustc.edu.cn)

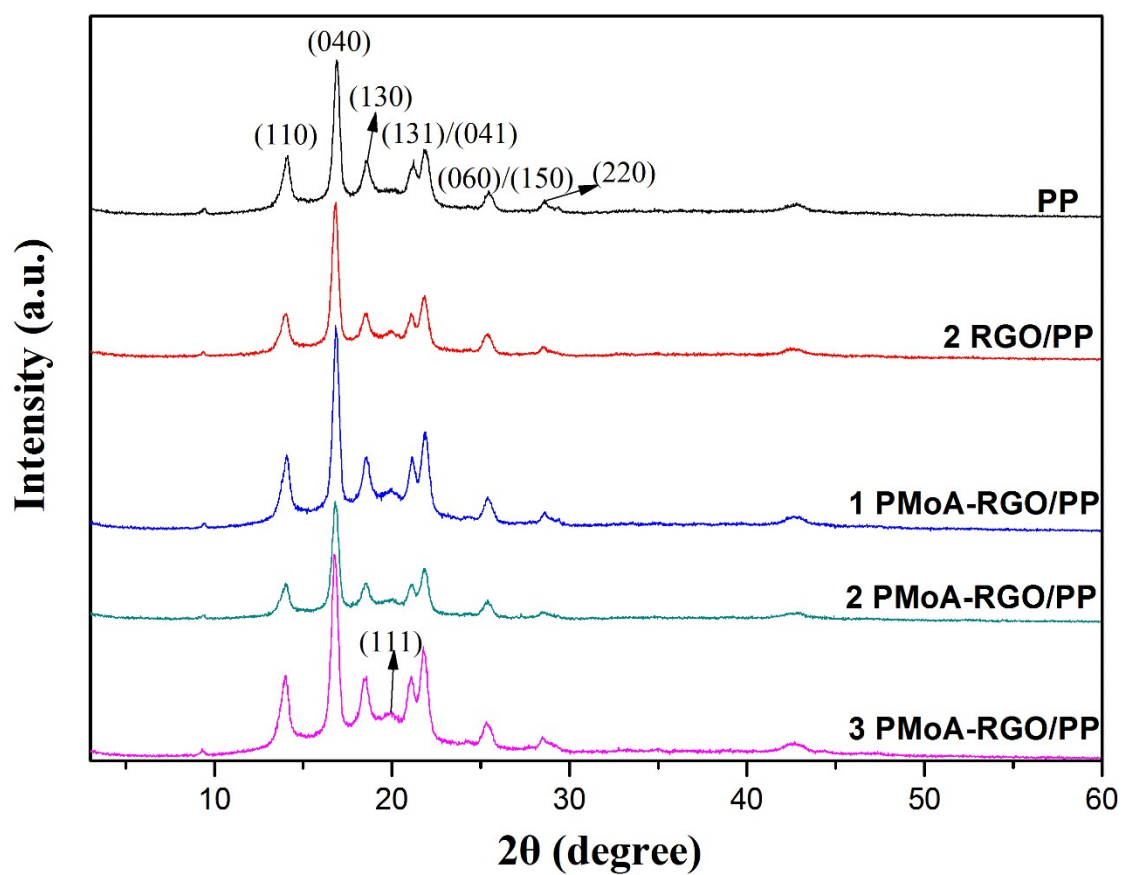

**Fig. S1** XRD patterns of neat PP and its nanocomposites

Both neat PP and its nanocomposites exhibit the characteristic (110), (040), (130), (111), (131)/(041), (060)/(150) and (220) planes of  $\alpha$ -crystal form of PP.<sup>1</sup>

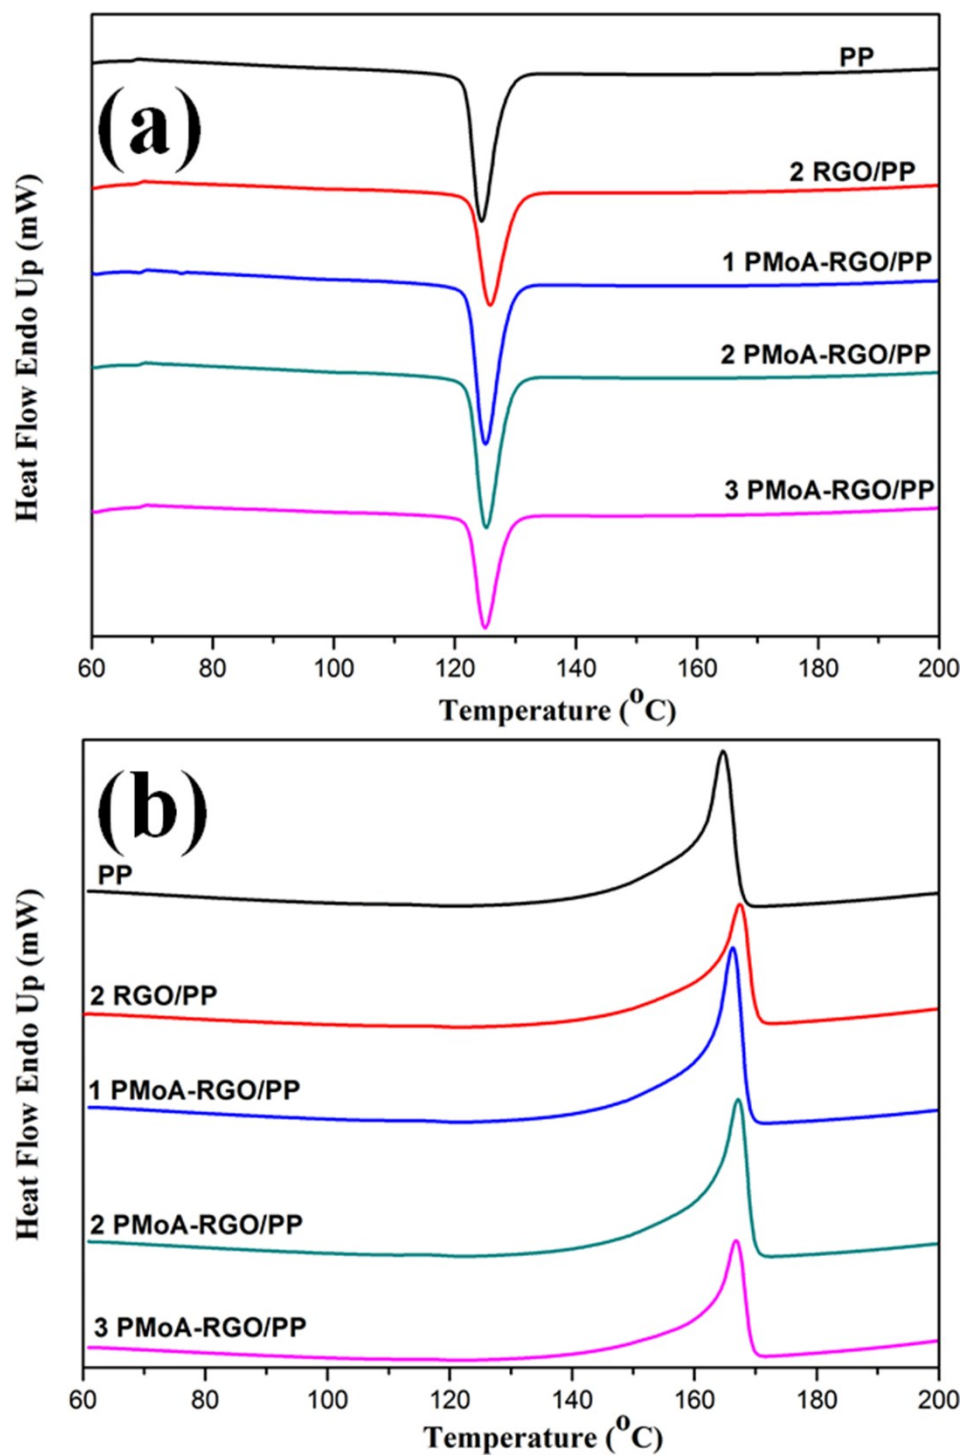

Fig. S2 DSC thermograms of cooling (a) and heating (b) scans of neat PP and its nanocomposites.

Table S1. DSC results of neat PP and its nanocomposites.

| Sample        | $T_c$ (°C) | $\Delta H_c$ (J·g <sup>-1</sup> ) | $T_m$ (°C) | $\Delta H_m$ (J·g <sup>-1</sup> ) | $X_c$ (%) |
|---------------|------------|-----------------------------------|------------|-----------------------------------|-----------|
| PP            | 124.3      | 76.2                              | 164.7      | 68.2                              | 32.6      |
| 2 RGO/PP      | 125.9      | 77.1                              | 167.6      | 66.7                              | 32.6      |
| 1 PMoA-RGO/PP | 125.1      | 78.4                              | 166.4      | 68.9                              | 33.3      |
| 2 PMoA-RGO/PP | 125.1      | 77.4                              | 167.2      | 66.3                              | 32.4      |
| 3 PMoA-RGO/PP | 124.9      | 77.4                              | 166.9      | 64.8                              | 32.0      |

**Fig. S2** shows the DSC curves of crystallization and melting processes of PP and its nanocomposites. The maximum crystallization ( $T_c$ ) and melting temperature ( $T_m$ ), crystallization ( $\Delta H_c$ ) and melting enthalpy ( $\Delta H_m$ ), and degree of crystallinity ( $X_c$ ) are listed in Table S1.  $X_c$  is calculated using the following equation:  $X_c = \Delta H_m / (f\Delta H_0)$ , where  $\Delta H_0 = 209 \text{ J}\cdot\text{g}^{-1}$  is the theoretical melting enthalpy of 100% crystalline PP,<sup>2</sup> and  $f$  is the weight fraction of PP in the nanocomposite. The incorporation of these nanomaterials is observed to exert little effect on the crystallization, melting behavior and crystallinity of PP.

## Reference

- 1 B. H. Yuan, C. L. Bao, L. Song, N. N. Hong, K. M. Liew and Y. Hu, *Chem. Eng. J.*, 2014, **237**, 411.
- 2 Y. Li, J. Zhu, S. Wei, J. Ryu, L. Sun and Z. Guo, *Macromol. Chem. Phys.*,

2011, **212**, 1951.
